# The peroxisome proliferator-activated receptor $\gamma$ is an inhibitor of ErbBs activity in human breast cancer cells

Miguel Pignatelli<sup>1</sup>, Marta Cortés-Canteli<sup>1</sup>, Cary Lai<sup>2</sup>, Angel Santos<sup>3,\*</sup> and Ana Perez-Castillo<sup>1,\*</sup>

<sup>1</sup>Instituto de Investigaciones Biomédicas, Consejo Superior de Investigaciones Científicas-Universidad Autónoma, 28029-Madrid

<sup>2</sup>Department of Neuropharmacology, The Scripps Research Institute, La Jolla, California 92037

<sup>3</sup>Departamento de Bioquímica y Biología Molecular, Facultad de Medicina, Universidad Complutense, Madrid

\*Authors for correspondence (aperez@iib.uam.es; piedras3@eucomax.sim.ucm.es)

Accepted 31 July 2001

Journal of Cell Science 114, 4117-4126 (2001) © The Company of Biologists Ltd

## SUMMARY

One of the most interesting recent developments in the nuclear receptor field has been the identification of natural and synthetic agonists of the peroxisome proliferator-activated receptor (PPAR) family, coupled with a growing recognition that the  $\gamma$  isoform (PPAR $\gamma$ ) affects pathways important in a variety of human diseases. Here we show that the activation of PPAR $\gamma$  through the 15-deoxy- $\Delta$ -12,14-prostaglandin J<sub>2</sub> (PG-J<sub>2</sub>) ligand causes a dramatic inhibition of ErbB-2 and ErbB-3 tyrosine phosphorylation caused by neuregulin 1 (NRG1) and neuregulin 2 (NRG2) in MCF-7 cells. This effect is accompanied by a very efficient blocking of ErbBs effects upon proliferation, differentiation and cell death in these cells. Preincubation of MCF-7 cells with PG-J<sub>2</sub> before addition of NRG1 and NRG2 had a dramatic growth-suppressive effect accompanied by accumulation of cells in the G<sub>0</sub>/G<sub>1</sub>

compartment of the cell cycle, and a marked increase in apoptosis. NRG1 and NRG2 induce G<sub>1</sub> progression, which was associated with stimulation of the phosphatidylinositol-3 kinase (PI 3-K) pathway, whereas survival was dependent on ERK1/ERK2 activation. Both pathways were inhibited by PG-J<sub>2</sub>. Furthermore, PG-J<sub>2</sub> can abolish the NRG1 and NRG2-induced increase in anchorage-independent growth of these cells. PG-J<sub>2</sub> also blocks phosphorylation of other receptor tyrosine kinases, such as IGF-IR, in MCF-7 cells, and suppress proliferation of other breast cancer cell lines. In summary, our data show a specific inhibitory action of PG-J<sub>2</sub> on the activity of the ErbB receptors in breast cancer cells.

Key words: Breast cancer, ErbBs, Phosphorylation, PPAR $\gamma$ , Transformation

## INTRODUCTION

Peroxisome proliferator-activated receptors (PPARs) are transcription factors belonging to the nuclear receptor gene superfamily (Mangelsdorf and Evans, 1995). The regulation of gene expression is exerted by the receptors upon heterodimerization with the 9-cis retinoic acid receptor and binding to specific response elements termed peroxisome proliferator-response elements (PPREs). Most PPREs identified to date reside in genes involved in lipid metabolism (Schoonjans et al., 1997). There are three members of the PPAR subfamily of nuclear receptors:  $\alpha$ ,  $\delta$  and  $\gamma$  (Tontonoz et al., 1994a; Dreyer et al., 1992; Kliewer et al., 1994). PPAR $\gamma$  is abundant in adipose tissue where it triggers adipocyte differentiation and lipid storage by regulating the expression of genes critical for adipogenesis (Tontonoz et al., 1994a; Tontonoz et al., 1994b). PPARs function as transcription factors regulating gene transcription in response to the binding of their ligands (Michalik and Wahli, 1999). There are several known ligands for PPAR $\gamma$ , including the natural prostaglandin 15-deoxy- $\Delta$ -12,14-prostaglandin J<sub>2</sub> (PG-J<sub>2</sub>, a prostaglandin D<sub>2</sub> metabolite), the synthetic antidiabetic thiazolidinediones (Lehmann et al., 1995) and certain polyunsaturated fatty acids. One of the thiazolidinediones, troglitazone (TGZ), is currently used in some countries for the treatment of type II diabetes (Johnson et al., 1998).

Although PPAR $\gamma$  is primarily expressed in adipose tissue, it is also expressed in many other tissues and cell types although its role is still poorly understood. Recent studies indicate that PPAR $\gamma$  is expressed in cells of the monocyte/macrophage lineage and that ligand activation of this receptor powerfully regulates several aspects of monocyte biology such as the development of monocytes along the macrophage lineage, in particular in the conversion of monocytes to foam cells (cholesterol-engorged macrophages) (Spiegelman, 1998). Sarraf et al. have demonstrated that human colonic epithelium and colon cancer cell lines express PPAR $\gamma$  and that growth of the cell lines is inhibited by diverse PPAR $\gamma$  agonists, whereas an inactive metabolite of troglitazone and a selective PPAR $\alpha$  agonist have no effect (Sarraf et al., 1998). In addition, Mueller et al. have shown that PPAR $\gamma$  is expressed at significant levels in human primary and metastatic breast adenocarcinomas (Mueller et al., 1998). Ligand activation of this receptor in cultured breast cancer cells caused extensive lipid accumulation, changes in breast epithelial gene expression associated with a more differentiated, less malignant, state. Some effects upon breast cancer cells have also been observed by other groups (Elstner et al., 1998; Kilgore et al., 1997).

Control of protein phosphorylation at tyrosine residues is a fundamental regulatory mechanism in signal transduction pathways involved in transformation and growth of breast cancer cells (Nguyen et al., 1995). Overexpression of type 1

receptor tyrosine kinases has been associated with several types of human cancers, including breast cancer and glioblastoma (Slamon et al., 1989; Kraus et al., 1987; Walker, 1998; Krisst and Yarden, 1996). This family of proteins consists of the epidermal growth factor receptor (EGFR/ErbB1), neu (ErbB2), ErbB3 and ErbB4 (Olayioye et al., 2000). Several studies have demonstrated that ErbB2 is amplified and overexpressed in 20-30% of primary breast cancers, a finding that correlates with poor patient prognosis (Paterson, 1991; Andrulis, 1998) and a more aggressive disease. An ErbB2-positive status may predict the likelihood of resistance to some conventional therapies. Furthermore, blockade and functional inhibition of c-erbB2 by monoclonal antibodies inhibits the growth of tumors that overexpress c-erbB2 (Drebin et al., 1986). Breast tumor progression is also associated with elevated levels of ErbB3, and a survey of primary human breast tumors revealed frequent co-expression of both ErbB2 and ErbB3 transcripts (Siegel et al., 1999). The incidence of amplification of the neu and ErbB3 oncogene-encoded protein tyrosine kinases in human breast cancer strongly supports the concept that protein tyrosine phosphorylation and dephosphorylation are key regulatory mechanisms in the proliferation, differentiation and neoplastic transformation of breast epithelial cells. In view of all the evidence commented above, the ErbB2 and ErbB3 receptor proteins have become very important targets for novel and specific anticancer treatment.

The neuregulins (NRGs) are a family of proteins that serve as ErbB ligands. They contain a region structurally related to EGF, the EGF-like domain, that can bind to and induce ErbB autophosphorylation. In addition to the NRGs and EGF, other molecules that contain an EGF-like domain and that can activate one or more ErbB receptors include transforming growth factor  $\alpha$  (TGF $\alpha$ ), heparin-binding EGF (HB-EGF), amphiregulin, betacellulin, epiregulin and cripto (Riese and Stern, 1998; Alroy and Yarden, 1997). Four distinct neuregulin genes (*NRG1*, *NRG2*, *NRG3* and *NRG4*) have been described (Carraway et al., 1997; Zhang et al., 1997; Harari et al., 1999). *NRG1* was first cloned as neu differentiation factor (NDF) and heregulin (Burden and Yarden, 1997; Lemke, 1996), but is best known for its roles as the acetylcholine receptor inducing activity (ARIA), and as the potent Schwann cell mitogen, glial growth factor (GGF). Mice that lack *NRG1* die at E10.5 from a heart defect and have virtually no Schwann cell precursors. *NRG1* has been implicated in multiple cellular processes, including proliferation, differentiation, survival and migration (Burden and Yarden, 1997; Lemke, 1996). The neuregulin 1 gene encodes multiple isoforms that each contain an EGF-like domain. Splicing appears to give rise to alternative extracellular regions including Ig-domain-containing forms, which are believed to serve in the function described as ARIA, and a cysteine-rich domain (CRD)-containing form, which is thought to serve as GGF. Recombinant neuregulin protein forms that contain the EGF-like domain have been shown to induce receptor activation *in vitro* (Olayioye et al., 2000).

We have investigated the ability of PG-J<sub>2</sub>, a natural specific ligand of PPAR $\gamma$ , to affect the induction by *NRG1* and *NRG2* of tyrosine phosphorylation/activation of ErbB2 and ErbB3 receptors expressed in MCF-7 cells, as well as its capacity to overcome the cellular responses elicited by the activation of

these receptors. Our results provide evidence that PPAR $\gamma$  effectively blocks ErbB phosphorylation and interferes with ErbB signaling pathways. It therefore appears to play a suppressive regulatory role in the tumor growth of human breast carcinoma cells that express c-erbB2/neu and ErbB3 protein tyrosine kinases.

## MATERIALS AND METHODS

### Cell culture and purification of recombinant NRGs

MCF-7 cells were propagated and maintained in RPMI medium (Life Technologies) containing 10% fetal bovine serum (FBS), 1000 IU penicillin-streptomycin and 2 mM glutamine at 37°C and 5% CO<sub>2</sub>. T47D and SKBR3 cells were cultured in DMEM medium (Life Technologies) containing 10% FBS. Experimental cultures were usually grown in serum-starved RPMI or, in some experiments, with 5% dextran-charcoal stripped FBS. After 24 hours of growth in these conditions, cells were stimulated with the appropriate ligand as indicated. Some cultures were pre-incubated with freshly dissolved Na<sub>3</sub>VO<sub>4</sub> at 100  $\mu$ M for 60 minutes. Specific kinase inhibitors were usually added 1 hour prior to treatment. These included LY294002 (Calbiochem, Nottingham, UK), a reversible inhibitor of PI 3-K used at 4  $\mu$ M, and PD98059 (Calbiochem), an inhibitor of MEK1 and -2 used at 40  $\mu$ M. Glutathione-S-transferase fusion proteins encoding the EGF-like domains of mouse *NRG1* $\beta$  (heregulin- $\beta$ 1 residues 176-246) and *NRG2* $\beta$  (*NRG2* $\beta$  residues 246-314) were produced in High Five cells and purified by glutathione affinity as described previously (Carraway et al., 1997).

### Immunoprecipitation and immunoblotting

For immunoprecipitation assays, cells were seeded at a density of 20,000/cm<sup>2</sup> and grown for 24 hours in complete medium, switched to the serum-treated medium and exposed for 10 hours to 10  $\mu$ M PG-J<sub>2</sub> (Calbiochem-Novabiochem Corp.). Cells were then stimulated with the growth factors *NRG-1*, *NRG-2*, EGF (30 nM) or IGF-I (100 nM) for 5 minutes. Cells were washed twice with ice-cold TD buffer (20 mM Tris-HCL pH 7.4, 130 mM NaCl, 5 mM KCl, 1 mM Na<sub>2</sub>HPO<sub>4</sub>), lysed in 500  $\mu$ l of PBS containing 1% NP40, 0.5% sodium deoxycholate, 0.1% SDS and protease and phosphatase inhibitors, and spun at 12,000 *g* for 20 minutes. Supernatants were precleared with pansorbin (Calbiochem-Novabiochem Corp.) and incubated for 12 hours at 4°C with the appropriate antibodies. Protein-A-Sepharose was added to each sample and additionally incubated for 5 hours at 4°C. Beads were collected by microcentrifugation and washed five times with lysis buffer.

The immunocomplexes were eluted by boiling for 3 minutes in SDS sample buffer (100 mM Tris, pH 6.8, 36% glycerol, 4% SDS, 0.01% bromophenol blue and 200 mM DTT) and subjected to SDS-PAGE. Proteins were then transferred to nitrocellulose membranes. The blots were blocked with 3% BSA in TBST buffer (20 mM Tris-HCL pH 7.6, 130 mM NaCl, 0.1% Tween-20) for 1 hour at room temperature and incubated with the horseradish peroxidase-coupled antiphosphotyrosine antibody RC-20 (Transduction Laboratories, Lexington, KY) used at 1:2500 dilution in TBST with 3% BSA for 2 hours. After several washes, immunoreactive bands were visualized using Amersham's ECL detection kit according to the manufacturer's instructions. Membranes were stripped and incubated with the corresponding antibodies for loading control.

MAPK activation was determined with an antiphospho-MAPK (p42 and p44)-specific mouse monoclonal antibody (New England Biolabs, Beverly, MA), and activated Akt was measured using a polyclonal antibody specific to phosphoserine 473 (New England Biolabs). After stripping, the membranes were incubated with anti-MAPK and anti-Akt polyclonal antibodies (Santa Cruz Biotechnology) for loading control.

### Proliferation assay and cell cycle studies

To monitor proliferation, cells were seeded in triplicate onto 96-well plates at a density of 7000 cells/well. After 24 hours of growth in normal medium, the cells were switched to serum-free medium and stimulated with NRG1 or NRG2 for 24 hours in the presence or absence of PG-J<sub>2</sub>. Radiolabeled [<sup>3</sup>H]thymidine (0.5 μCi) was then added and the cells were grown for an additional 24 hours. Cells were harvested and [<sup>3</sup>H] radioactivity was measured in a solid scintillation counter. For cell cycle analysis, cells were treated with the NRGs for 24 hours and some of the cultures were preincubated for 10 hours with PG-J<sub>2</sub>. Cells were then fixed in 70% ethanol/PBS, pelleted and resuspended in buffer containing 100 μg/ml RNase A and 0.01 mg/ml propidium iodide. Cell cycle distribution was determined by cytofluorometry using the ModFit LT program.

### Soft agar colony assays

Anchorage-independent growth was determined by first suspending 10,000 cells in 0.3% agar in tissue culture medium containing 5% stripped serum in 60 mm plates over a bottom layer of 0.5% agar in medium. The cells were allowed to grow for 20 days with weekly refeeding. NRGs and/or PG-J<sub>2</sub> were added every 3-4 days. Colonies were stained with p-iodotetrazolium violet. Experiments were carried out three times in duplicate.

### Nile red staining

Nile red staining was performed essentially as described (Greenspan et al., 1985). Briefly, cells were seeded in a 6-well plate and, after a 48 hour incubation with PG-J<sub>2</sub> and/or NRGs, directly stained with

1 ml of 0.1 μg/ml final concentration of the fluorescent stain Nile red (Sigma Chemical Co.) in TD (prepared by dilution of a stock solution which was 0.1 mg/ml in acetone) for 5 minutes. Sample observation was carried out immediately after its preparation. Nile red-stained cells were then examined with a Zeiss Axiophot microscope.

### Apoptosis assay

To calculate the extent of cell death, 0.5×10<sup>6</sup> cells were cultured in 10-cm diameter tissue culture plates and grown in RPMI for 24 hours before switching to serum-free medium containing the factors indicated in the figure legends for an additional 72 hours. For analyses, both the floating cells in the supernatant and in the PBS wash were collected from each plate. Apoptotic cells were assayed by analyzing annexin V conjugated to fluorescein isothiocyanate (annexin-V-FITC) (Bender MedSystems, Vienna, Austria) to determine the translocation of phosphatidylserine from the inside to the outside of the plasma membrane. Cell staining was performed according to the manufacturer's instructions.

## RESULTS

### Effects of PPAR<sub>γ</sub> activation on ErbB2/ErbB3 protein levels and phosphorylation

We first examined the ability of NRG1 and NRG2 to activate ErbB2 and ErbB3 in MCF-7 cells. Cells were treated with factor, lysed and ErbB receptors were immunoprecipitated.

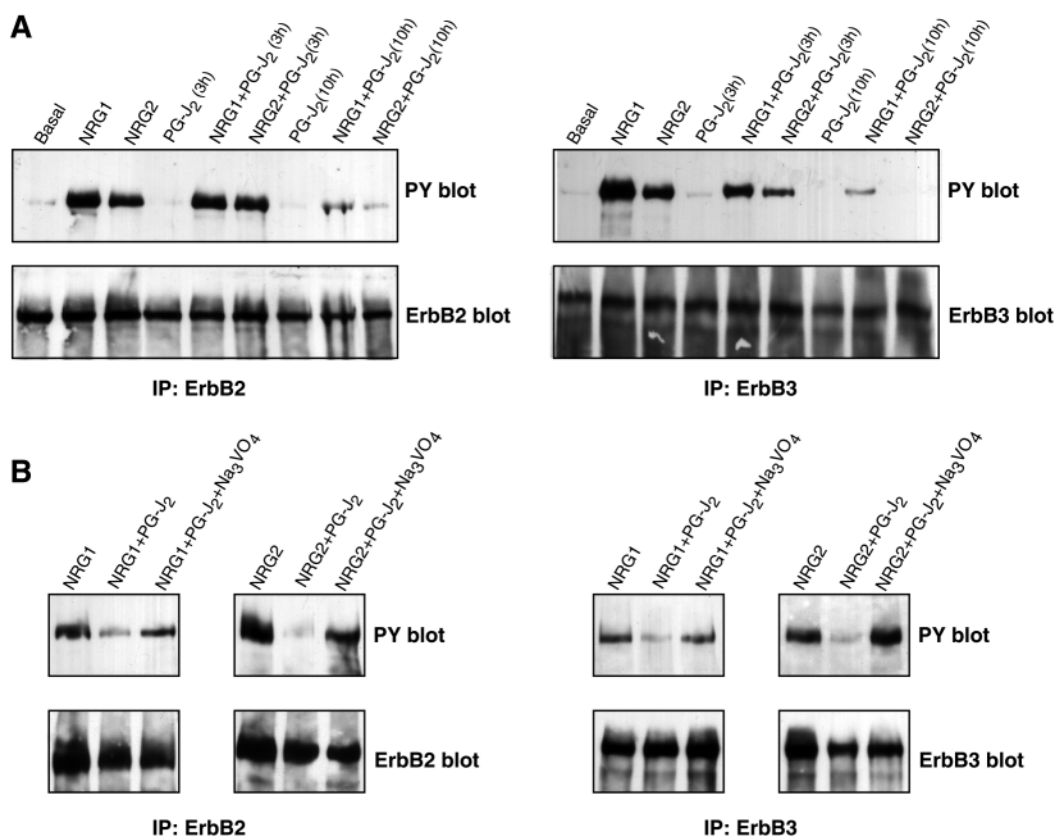

**Fig. 1.** Effect of PG-J<sub>2</sub> treatment on the phosphorylation state of ErbB2 and ErbB3. (A) Subconfluent MCF-7 cells were cultivated for 3 or 10 hours in the presence or absence of 10 μM PG-J<sub>2</sub> as indicated. Thereafter the cells were stimulated with NRG1 or NRG2 for 5 minutes and the lysates were used for immunoprecipitation (IP) with anti-ErbB2 or anti-ErbB3 polyclonal antibodies. The immunoprecipitates were subjected to SDS-polyacrylamide gel electrophoresis and immunoblotted with the indicated antibodies. (B) Same experiment as in A; however, the cells were treated with 1 mM ortovanadate prior to PG-J<sub>2</sub> treatment.

These proteins were size-fractionated on acrylamide gels, transferred to nitrocellulose membranes and phosphorylated receptors were visualized with antiphosphotyrosine antibodies. As can be seen in Fig. 1A, the level of tyrosine phosphorylation of both ErbB2 and ErbB3 in MCF-7 cells was markedly increased by treatment with either growth factor and the extent of receptor tyrosine phosphorylation was similar for both neuregulins, although NRG1 was slightly more efficient in stimulating phosphorylation than NRG2.

To assess the effect of activation of PPAR $\gamma$  upon phosphorylation of ErbB2 and ErbB3, PG-J<sub>2</sub> ligand was applied to MCF-7 cells 3 and 10 hours before the addition of neuregulin factor, which was applied for 5 minutes prior to cell harvesting. As shown in Fig. 1A, the addition of PG-J<sub>2</sub> virtually eliminated the observed phosphorylation of both ErbBs. This effect was only observed when MCF-7 cultures were preincubated for 10 hours. After stripping, the blots were reprobbed with either anti-ErbB2 or anti-ErbB3 and it was determined that treatment of MCF-7 cells with PG-J<sub>2</sub> did not alter the level of ErbB protein. When transcription was inhibited with actinomycin D, the dephosphorylation effect of PG-J<sub>2</sub> was almost completely abolished (data not shown). These data imply that the novo transcription is required for PG-J<sub>2</sub> to alter ErbB2/3 phosphorylation in MCF-7 cells.

To ascertain the possible involvement of PTPases in this reduction of receptor phosphorylation by PG-J<sub>2</sub>, MCF-7 cells were treated with 1 mM pervanadate prior to PG-J<sub>2</sub> stimulation. We determined that the dephosphorylation of the ErbB2 and ErbB3 receptors was almost completely blocked by the addition of pervanadate to the culture medium (Fig. 1B). These data suggest that the reduction in phosphotyrosine content of the ErbB receptors induced by PG-J<sub>2</sub> is mediated by PTPases.

To determine whether PG-J<sub>2</sub> effects were restricted to ErbB2 and ErbB3 phosphorylation, the effect of this prostaglandin on phosphorylation of two other receptor tyrosine kinases: epidermal growth factor receptor (EGF-R) and insulin-like growth factor I receptor (IGF-IR) was examined. As shown in Fig. 2, the level of tyrosine phosphorylation of EGF-R and IGF-IR in MCF-7 cells was significantly increased by treatment with EGF and IGF-I, respectively. The addition of PG-J<sub>2</sub> markedly decreased the observed phosphorylation of IGF-IR without affecting the phosphotyrosine content of EGF-R.

### Effects of NRGs and PPAR $\gamma$ activation on cell growth and transformation

The effects of ligand activation of PPAR $\gamma$  on cell growth was assessed by monitoring cell proliferation in a [<sup>3</sup>H]thymidine incorporation assay. Treatment of MCF-7 cells with PG-J<sub>2</sub> for 24 hours resulted in a 90% inhibition of thymidine incorporation (Fig. 3A). By contrast, addition of either NRG1 or NRG2 caused a twofold increase in growth rate. However, when NRG1 or NRG2 were added to the culture medium together with PG-J<sub>2</sub>, the prostaglandin completely abolished the ability of either neuregulin to stimulate thymidine incorporation (Fig. 3A). These results reveal that the activation of PPAR $\gamma$  blocks the pathway activated by the neuregulins to promote cell proliferation.

To better understand the nature of the growth retardation associated with PG-J<sub>2</sub> treatment, MCF-7 cells were synchronized in G0/G1 by serum starvation and their

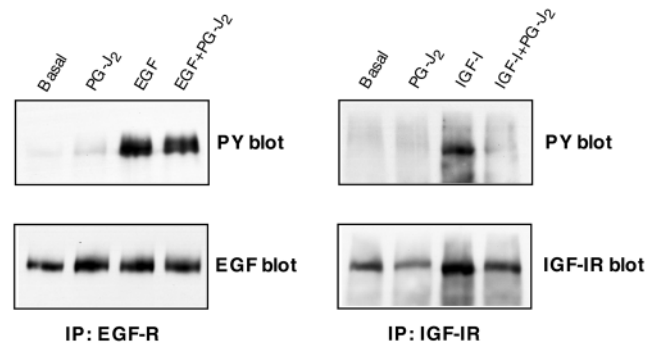

**Fig. 2.** Effect of PG-J<sub>2</sub> treatment on the phosphorylation state of EGF-R and IGF-IR. Subconfluent MCF-7 cells were cultivated for 10 hours in the presence or absence of 10  $\mu$ M PG-J<sub>2</sub> as indicated. Thereafter the cells were stimulated with EGF or IGF-I for 5 minutes and the lysates were used for immunoprecipitation (IP) with anti-EGF-R or anti-IGF-IR polyclonal antibodies. The immunoprecipitates were subjected to SDS-polyacrylamide gel electrophoresis and immunoblotted with the indicated antibodies.

progression through the cell cycle was followed for 24 hours upon release into normal medium or medium supplemented with the neuregulins and/or PG-J<sub>2</sub>. The proportion of cells at specific stages of the cell cycle was determined by flow cytometry. It was observed (Fig. 3B) that the addition of NRG1 or NRG2 induced a significant increase in the number of cells in the S phase of the cell cycle (51% and 44%, respectively). By contrast, the cell cycle profiles of MCF-7 cells preincubated with PG-J<sub>2</sub> for 10 hours before the addition of NRG1 or NRG2 were significantly altered, with a complete block at the G0/G1 boundary and almost no cells progressing through the S phase. In randomly proliferating MCF-7 cells PG-J<sub>2</sub> causes a G2/M arrest (data not shown), suggesting that the prostaglandin can be acting at different stages of the cell cycle.

To identify intracellular signal transduction pathways linked to NRG1 and NRG2-induced cell cycle progression, we treated MCF-7 cells with specific kinase inhibitors. Treatment of MCF-7 cells with LY294002, an inhibitor of PI 3-K, prevented NRG1 and NRG2-induced G1 progression (Fig. 3B). However, PD98509, an inhibitor of the mitogen-activated protein kinase pathway that selectively inhibits the MAPK activating enzyme, MAP kinase kinase (MEK), did not prevent NRG1 and NRG2-induced cell cycle progression. These data suggest that it is the PI 3-K pathway and not the MAPK pathway that is required for neuregulin-induced DNA synthesis.

To better understand the regulation of the PI 3-K signaling pathway by neuregulins, and the possible involvement of PG-J<sub>2</sub>, MCF-7 cells were preincubated with PG-J<sub>2</sub> and then treated with either NRG1 or NRG2. Phosphorylation of Akt was analyzed by using a phospho-specific antibody (which recognizes Akt only when phosphorylated at the Ser-473 residue). As shown in Fig. 4A, Akt phosphorylation was not present in unstimulated serum-starved MCF-7 cells. Stimulation with both NRG1 and NRG2 dramatically increased phosphorylation of Akt within 10 minutes of treatment. When cells were preincubated with prostaglandin, a significant suppression of Akt phosphorylation was detected.

One measure of cell transformation is the ability of cells to exhibit anchorage independent growth. MCF-7 cells treated either with NRG1 or NRG2 exhibit the ability to grow

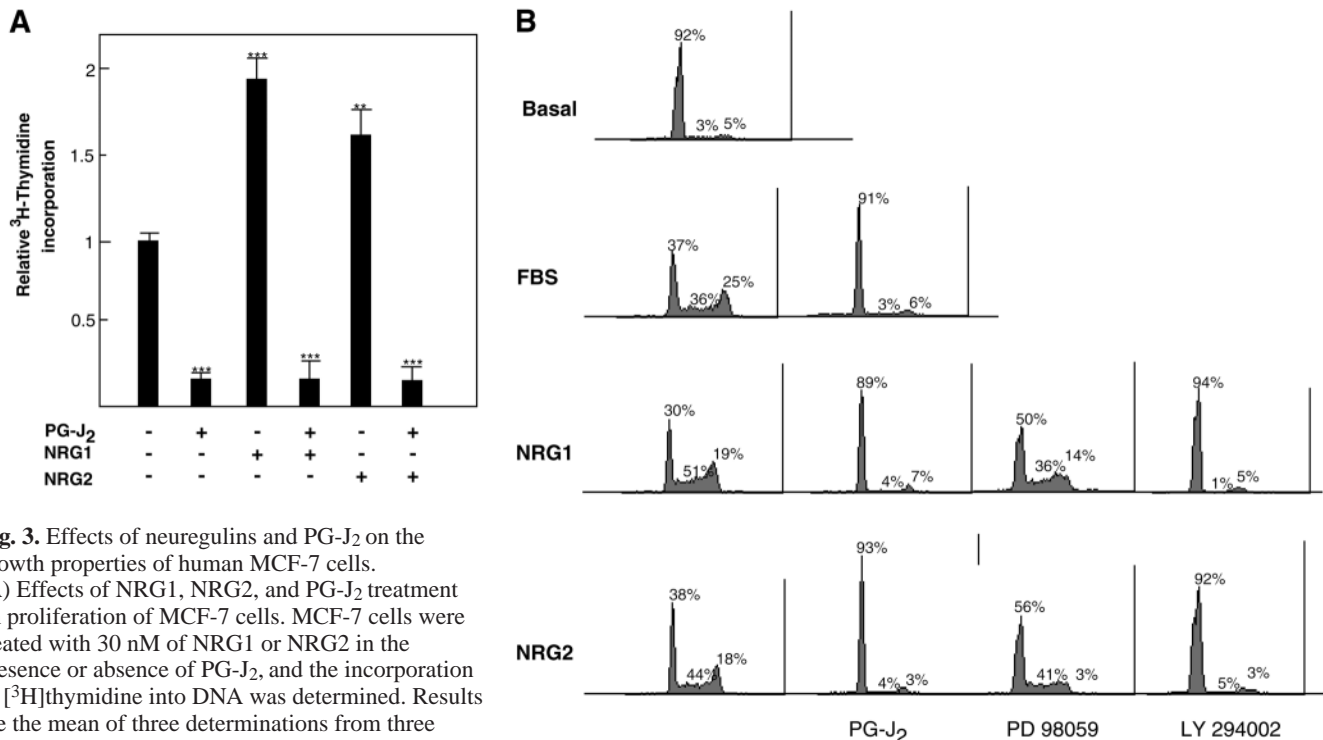

**Fig. 3.** Effects of neuregulins and PG-J<sub>2</sub> on the growth properties of human MCF-7 cells. (A) Effects of NRG1, NRG2, and PG-J<sub>2</sub> treatment on proliferation of MCF-7 cells. MCF-7 cells were treated with 30 nM of NRG1 or NRG2 in the presence or absence of PG-J<sub>2</sub>, and the incorporation of [<sup>3</sup>H]thymidine into DNA was determined. Results are the mean of three determinations from three different experiments. \*\**P*≤0.01; \*\*\**P*≤0.001.

(B) Effects of PG-J<sub>2</sub> and kinase inhibitors on NRG-1 and NRG-2 effects on cell cycle progression. Cells were grown for 24 hours in the presence or absence of NRG1 or NRG2 preincubated or not for 10 hours with PG-J<sub>2</sub>, and analyzed by PI staining and FACS analysis. Inhibitors of MEK1 and 2 (40 μM PD98059) or PI 3-K (4 μM LY294002) were added 1 hour before treatment with neuregulins. Curves modeling the G<sub>0</sub>/G<sub>1</sub>, S, and G<sub>2</sub>/M compartments, derived by using the ModFit program, are shown. Cell number is plotted on the y axes, and DNA content is plotted on the x axes.

numerous colonies in soft agar (Fig. 5). After 20 days in culture, these colonies were large enough to be visible upon inspection, even when unstained. Cells treated with PG-J<sub>2</sub> did not exhibit anchorage-independent growth. These results suggest that PG-J<sub>2</sub> treatment can restore normal cellular growth characteristics and abrogate the transforming effects of the neuregulins on MCF-7 cells, although the observed effects could be due to the potent anti-mitogenic activity of this prostaglandin.

**Effects of NRGs and PPAR<sub>γ</sub> activation on differentiation and programmed cell death**

To determine the effects of PPAR<sub>γ</sub> activation on MCF-7 cell differentiation, PG-J<sub>2</sub> was applied to MCF-7 cells. As shown in Fig. 6, when the cells were treated with 10 μM PG-J<sub>2</sub> for 48 hours, they underwent a dramatic morphological change where they became filled with neutral lipids that stained with Nile red. Only a very small number of stained cells were observed in the control condition and after incubation with NRG1 or NRG2. Addition of PG-J<sub>2</sub> to the culture medium along with the neuregulins resulted in approximately the same percentage of stained cells as when prostaglandin was added alone. Thus activation of PPAR<sub>γ</sub> can stimulate a distinct change in the appearance of these breast cancer cells even in the presence of ErbB ligands.

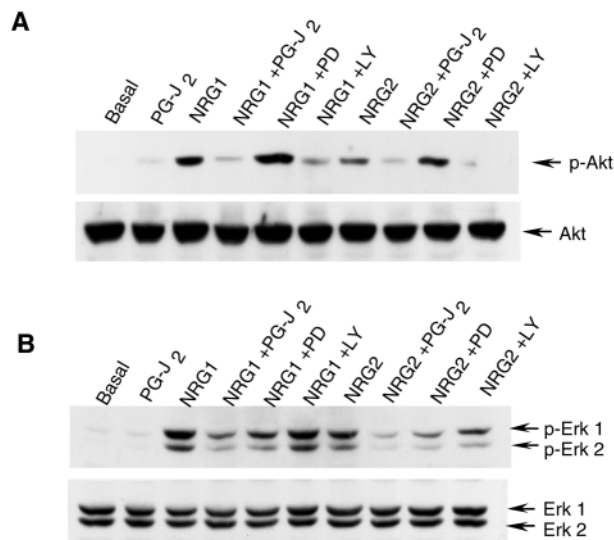

**Fig. 4.** Activation of MAPK and PI 3-K by NRG1 and NRG2. Cells were stimulated with NRG1 or NRG2 and some cultures were preincubated for 1 hour with PD98059 (40 μM) or LY294002 (4 μM), or for 10 hours with PG-J<sub>2</sub>. (A) PI 3-K activation was determined by measuring the extent of Akt phosphorylation by western blotting using an anti-phospho-Akt-specific goat polyclonal antibody. Total Akt protein was determined by stripping and reprobng the blot with an anti-Akt polyclonal antibody. (B) MAPK activation was determined by measuring the extent of MAPK phosphorylation by western blotting using an antiphospho-MAPK (p42 and p44)-specific mouse monoclonal antibody. Total MAPK protein content was determined by stripping and reprobng the blot using an anti-MAPK-p42 and an anti-MAPK-p44 polyclonal antibody.

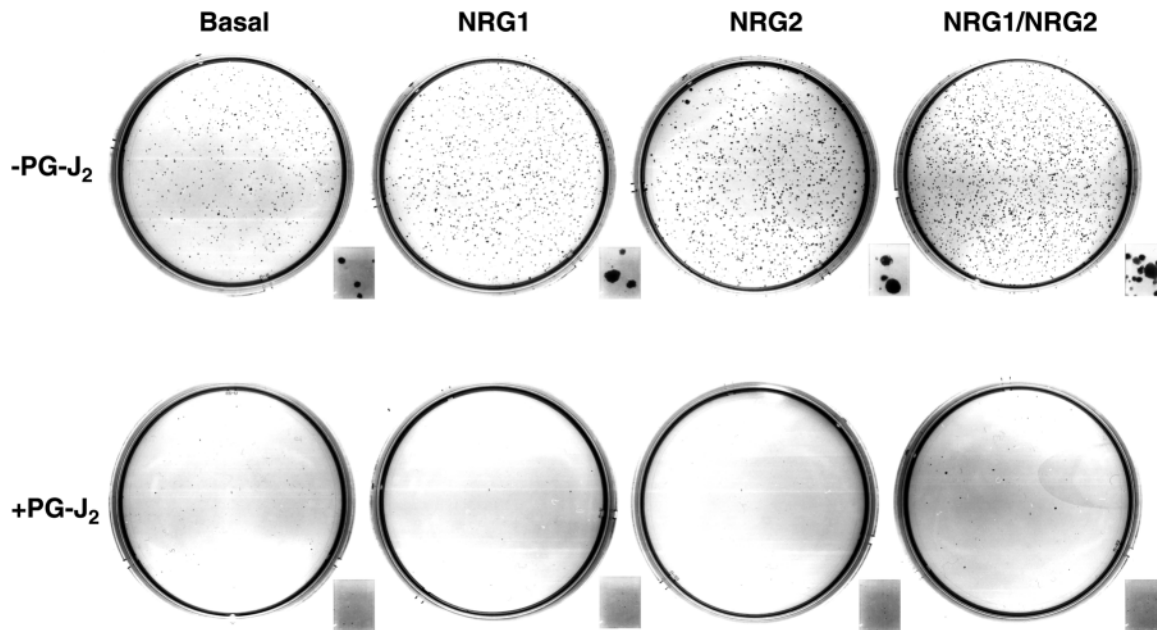

**Fig. 5.** Effects of NRG1, NRG2 and/or PG-J<sub>2</sub> on the clonogenicity of MCF-7 cells. After 24 hours of seeding, cells were treated as indicated in Materials and Methods. Representative plates and microphotographs (25-fold magnification) of clones are shown.

To determine if NRG1 and NRG2 were able to affect programmed cell death and whether the addition of PG-J<sub>2</sub> could overcome this effect, we added NRG1 or NRG2, either alone or in combination with PG-J<sub>2</sub>, and measured the number of apoptotic cells 72 hours after treatment. Apoptotic cells were assessed by staining with annexin-V-FITC and quantified by flow cytometry. As shown in Fig. 7, untreated cells incubated in the absence of serum yielded approximately 10% annexin-V-FITC<sup>+</sup> apoptotic cells. Under these conditions both NRG1 and NRG2 induced a significant increase in cell survival, whereas activation of PPAR $\gamma$  completely abolished this effect and instead led to a significant increase in the apoptotic population.

We next tested which signaling pathways were essential for the survival effect induced by neuregulins in these cells. Fig. 7 shows that NRG1 and NRG2-induced survival could be largely repressed by adding the MAPK inhibitor PD98059, but only weakly repressed by the PI 3-K inhibitor LY294002, suggesting that neuregulin-induced survival in MCF-7 cells is primarily mediated through the MAPK pathway. Exposure of cells to NRG1 or NRG2 results in a significant ERK activation, whereas MCF-7 cells not treated with the neuregulins show only a very small level of kinase activity (Fig. 4B). However, when MCF-7 cells are preincubated with PG-J<sub>2</sub> no activation of ERK was observed, suggesting a

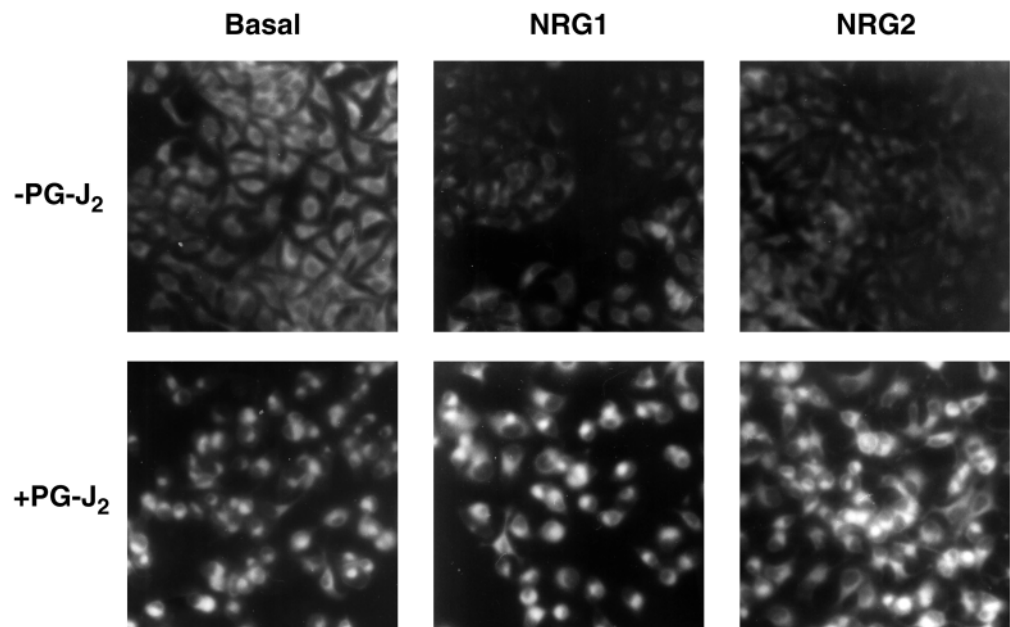

**Fig. 6.** Fluorescence microphotographs (100-fold magnification) of MCF-7 cells stained with 0.1  $\mu$ g/ml of Nile red and viewed at yellow-gold fluorescence.

block of the MAP kinase cascade induced by these neuregulins.

Finally, to address the question of whether the dephosphorylation/deactivation effect of PG-J<sub>2</sub> was restricted to MCF-7 cells, we next examined the effects of PG-J<sub>2</sub> in two other human mammary epithelial cell lines: T47D and SKBR3, the latter having a high basal ErbB2 phosphotyrosine content. We first analyzed the phosphorylation state of ErbB2 and ErbB3 in cells stimulated with NRG1 or NRG2 and preincubated or not with PG-J<sub>2</sub>. As shown in Fig. 8A, NRG1-induced phosphorylation of ErbB2 and ErbB3 in T47D was completely abolished by PG-J<sub>2</sub> preincubation. The same results were obtained with NRG2 (data not shown). In SKBR3 cells, as expected, ErbB2 was already highly phosphorylated in basal conditions and no further effect of the NRGs was observed. By contrast, ErbB3 phosphorylation was clearly induced by NRGs (only NRG1 data are shown). Preincubation with PG-J<sub>2</sub> dramatically blocked the basal phosphorylation levels of ErbB2. NRG1-induced phosphorylation of ErbB3 was also significantly inhibited by this prostaglandin (Fig. 8A). Next, we examined the effect of ligand activation of PPAR $\gamma$  on cell growth of T47D and SKBR3 by analyzing thymidine incorporation (Fig. 8B). Consistent with its effects on ErbB2 and ErbB3 phosphorylation, PG-J<sub>2</sub> also caused a dramatic decrease in basal and neuregulin-induced T47D and SKBR3 cell proliferation.

## DISCUSSION

Upon neuregulin stimulation, the ErbB2 and ErbB3 receptors are phosphorylated on multiple tyrosine residues that function as docking sites for cytoplasmic signaling proteins that contain a phosphotyrosine binding motif (SH2 or PTB domains) (Olayioye et al., 2000). In this paper, we show that activation of ErbB2 and ErbB3 in MCF-7 cells results in a number of changes including an increase in cell proliferation and enhanced cell survival. Moreover, results from soft agar assays reveal that NRG1 and NRG2 promote anchorage-independent growth of these cells. Importantly, we demonstrate that treatment of MCF-7 cells with a natural ligand of PPAR $\gamma$ , PG-J<sub>2</sub>, dramatically reduces ligand-induced ErbB phosphorylation. This is accompanied by a complete block of the effects of the NRGs on these cells, as the treatment of MCF-7 breast cancer cells with the prostaglandin PG-J<sub>2</sub> inhibits growth and tumorigenicity induced by ErbB activation. Inhibition of ErbB2 and ErbB3 phosphorylation by PG-J<sub>2</sub> leads to G1 arrest and induction of apoptosis in MCF-7 cells. These observations provide a possible mechanism for the observed effects of prostaglandins on breast cancer cells.

Although PPAR $\gamma$  was initially described in adipocytes and hepatocytes, recently it was shown that this receptor is expressed in macrophages and in human mammary epithelial

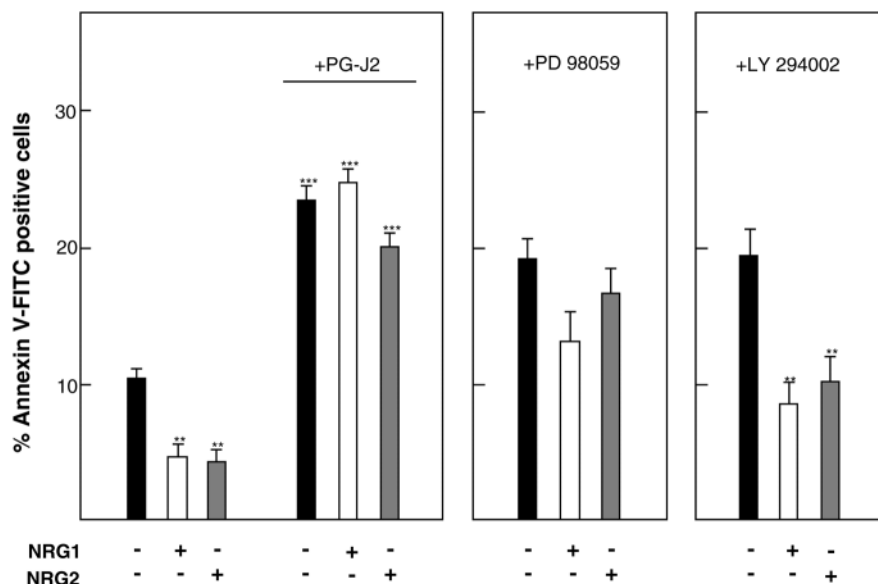

**Fig. 7.** Effects of NRG1, NRG2 and/or PG-J<sub>2</sub> on apoptosis of MCF-7 cells. Cells were cultured for 72 hours in serum-free medium containing the indicated factors, and apoptotic cells were detected by measuring annexin V-FITC binding by flow cytometry. Inhibitors of MEK1 and -2 (40  $\mu$ M PD98059) or PI 3-K (4  $\mu$ M LY294002) were added 1 hour before treatment with the neuregulins. Results are the mean of three determinations from three different experiments. \*\* $P$ ≤0.01; \*\*\* $P$ ≤0.001.

cell lines. Elstner et al. have recently found that breast cancer cells express high levels of this receptor, whereas normal human breast epithelial cells lining the mammary ducts express only a low level of PPAR $\gamma$  protein (Elstner et al., 1998). These authors have also shown that some ligands of PPAR $\gamma$ , such as troglitazone (TGZ), inhibited the clonal growth of several breast cancer cell lines and slightly increased the levels of the apoptotic population. Also, an anti-tumor effect of PPAR $\gamma$  ligands was observed in mice injected with prostate tumor cells and it has been shown that troglitazone promotes terminal differentiation of human liposarcoma cells in vitro and in patients suffering from advanced liposarcoma (Demetri, 1999). These data, along with the findings of others (Kilgore et al., 1997; Gimble, 1998; Mueller et al., 1998) suggest a possible role for ligand-activated PPAR $\gamma$  as an anti-tumor agent in breast cancer. The evidence presented here not only supports this hypothesis but also indicates a possible mechanism by which prostaglandins could affect the proliferation, differentiation and death of breast cancer cells.

Our studies provide a link between PPAR $\gamma$  and ErbB signaling, with PPAR $\gamma$  being able to suppress ErbB activation dramatically. The negative effects of PPAR $\gamma$  on ErbB signaling appear to block the cell's ability to mount proliferative and anti-apoptotic responses, thereby ensuring a non-proliferative outcome regardless of the presence of activating ErbB ligands. Based on the relatively long period of time (10 hours) required to achieve its effect, and its sensitivity to actinomycin D, it appears that the effects of PG-J<sub>2</sub> are directly mediated through PPAR $\gamma$  activation. The NRGs have been implicated in a wide variety of physiological and developmental processes including cardiac development, the proliferation and differentiation of oligodendroglial and Schwann cell precursors, the formation of the neuromuscular synapse,

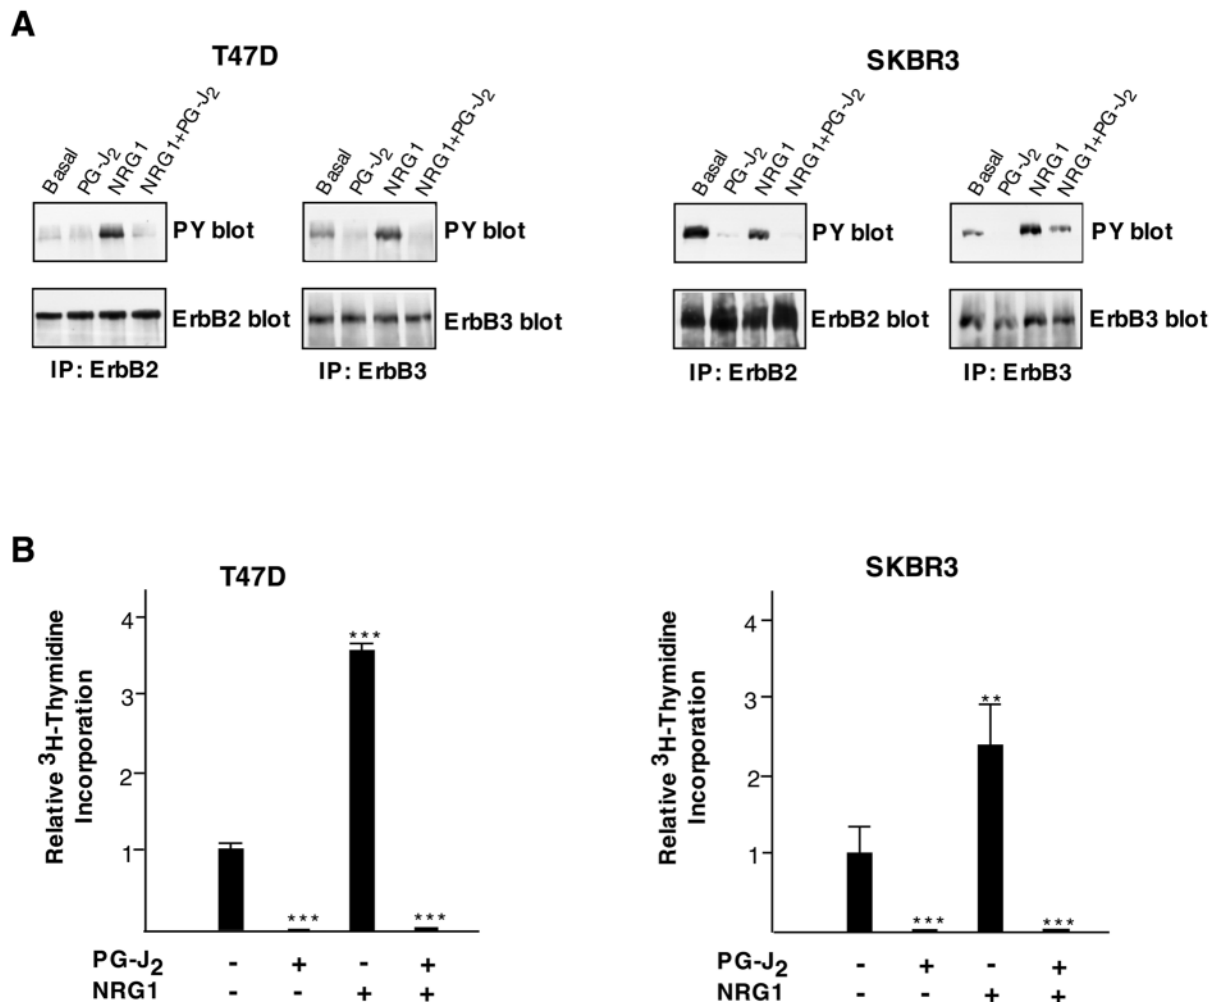

**Fig. 8.** Effect of PG-J<sub>2</sub> on T47D and SKBR3 breast cancer cell lines. (A) Effect of PG-J<sub>2</sub> treatment on the phosphorylation state of ErbB2 and ErbB3. Subconfluent cells were cultivated for 10 hours in the presence or absence of 10 μM PG-J<sub>2</sub> as indicated. Thereafter the cells were stimulated with NRG1 for 5 minutes and the lysates were used for immunoprecipitation (IP) with anti-ErbB2 or anti-ErbB3 polyclonal antibodies. The immunoprecipitates were subjected to SDS-polyacrylamide gel electrophoresis and immunoblotted with the indicated antibodies. (B) Effects of NRG1 and PG-J<sub>2</sub> treatment on cell proliferation. Both cell lines were treated with 30 nM of NRG1 in the presence or absence of PG-J<sub>2</sub>, and the incorporation of [<sup>3</sup>H]thymidine into DNA was determined. Results are the mean of three determinations from two different experiments. \*\**P*≤0.01; \*\*\**P*≤0.001.

epithelial morphogenesis, as well as in pathological states (Burden and Yarden, 1997). The discovery of additional NRG genes has increased the potential signaling complexity of the NRG/ErbB network. NRGs have been shown to be potent mitogens for Schwann cells and astrocytes in cell culture as well as inhibitors of apoptosis in cardiac myocytes (Lemke, 1996; Zhao et al., 1998). However, several reports show that, in addition to promoting proliferation, NRGs can induce apoptosis (Daly et al., 1997; Kirchhoff and Hauser, 1999; Daly et al., 1999). Our results further support a role for the NRGs in promoting the proliferation of breast cancer cells, but differ from the pro-apoptotic effects reported by other authors, as we have observed that NRG1 and NRG2 have a significant anti-apoptotic effect in MCF-7 cells.

In this work we have also examined the signaling pathways involved in neuregulin-induced cell proliferation and survival. Our results suggest that, in MCF-7 cells, G1 progression is associated with the phosphatidylinositol 3-kinase pathway,

whereas the anti-apoptotic effects were dependent on ERK1/2 activation. The inhibition of ERK1 and ERK2 by the MEK inhibitor PD98059 largely blocks the survival effects of NRG1 and NRG2 but has little effect on cell cycle progression. These results are noteworthy as, in most systems, activation of the MAPK signaling pathway has been associated with cell proliferation (Pages et al., 1993; Dhnasekaran and Reddy, 1998). The PI 3-K inhibitor LY294002 blocks Akt phosphorylation in MCF-7 cells, a finding that correlates with the abolishment of NRG1 and NRG-2-induced proliferation. This inhibitor has little effect on the reduction of apoptosis. These results are in agreement with previous data showing an induction of G1 progression in the breast cancer cell line SKBR3 through the PI 3-K pathway (Daly et al., 1999). However, studies with cells of the oligodendrocyte lineage show that activation of Akt by heregulin plays a major role in cell survival but has no effect upon proliferation (Flores et al., 2000). The role of Akt in the regulation of the cell cycle has



received significantly less attention than its role in the regulation of apoptosis. Cell cycle regulation by Akt was first observed by Ahmed et al. (Ahmed et al., 1997) and was later confirmed by Brennan et al. who showed that Akt transduces PI-3K-dependent IL-2 signals leading to the phosphorylation of Rb and promoting the activation of E2F (Brennan et al., 1997).

The present data demonstrate that PG-J<sub>2</sub>, a specific ligand of PPAR $\gamma$ , is a robust inhibitor of ErbB signaling pathways in the MCF-7 breast cancer cell line and is capable of completely blocking the transforming capacity of ErbB2 and ErbB3. These findings indicate that prostaglandins inhibit mammary epithelial proliferation and induce apoptosis, at least in part by antagonizing the actions of the neuregulins via receptor dephosphorylation. The strong blocking effect of PG-J<sub>2</sub> on cell cycle progression induced by serum (Fig. 3B) suggests that other growth factor signaling pathways may be the target of the action of this prostaglandin. In fact, we have also demonstrated that, in addition to blocking the ErbB signaling pathway, PG-J<sub>2</sub> caused a significant decrease in the phosphotyrosine content of IGF-IR, without modifying the phosphorylation levels of EGF-R. These results suggest that, although not all signaling pathways are affected, PG-J<sub>2</sub> blocks other tyrosine kinase systems in breast cancer cells. Interestingly, the effects of PG-J<sub>2</sub> seem to be quite general, since the ErbB tyrosine phosphorylation is also completely abolished in other breast cancer cell lines, such as T47D and SKBR3.

In conclusion, these observations suggest that PPAR $\gamma$  and locally produced prostaglandin D<sub>2</sub> metabolites may be involved in the regulation of cancer cell growth and development. These findings raise the possibility that synthetic PPAR $\gamma$  ligands may be of therapeutic value in human diseases, such as breast cancer, in which activated ErbB receptors play prominent pathogenic roles.

This work has been supported by Grants from the Dirección General de Enseñanza Superior e Investigación Científica, Grants PM97-0063 (A.P.-C.) and PM96-0051 (A.S.) and by the Comunidad de Madrid, Grant 08.5/0003/1997 (A.P.-C. and A.S.). M.P. is a fellow of the Fondo de Investigaciones Sanitarias de la Seguridad Social. M.C.-C. has a fellowship from the Comunidad de Madrid. We thank Alberto M. Alvarez (Facultad de Farmacia, Universidad Complutense, Madrid) for his technical assistance with the flow cytometry analysis

## REFERENCES

- Ahmed, N. N., Grimes, H. L., Bellacosa, A., Chan, T. O. and Tschlis, P. N. (1997). Transduction of interleukin-2 antiapoptotic and proliferative signals via Akt protein kinase. *Proc. Natl. Acad. Sci.* **94**, 3627-3632.
- Alroy, I. and Yarden, Y. (1997). The ErbB signaling network in embryogenesis and oncogenesis: signal diversification through combinatorial ligand-receptor interactions. *FEBS Lett.* **410**, 83-86.
- Andrulis, I. L. (1998). Neu/erbB2 amplification identifies a poor prognosis group of women with node-negative breast cancer. *J. Clin. Oncol.* **16**, 1340-1349.
- Brennan, P., Babbage, J. W., Burgering, B. M., Groner, B., Reif, K. and Cantrell, D. A. (1997). Phosphatidylinositol 3-kinase couples interleukin-2 receptor to the cell cycle regulator E2F. *Immunity* **7**, 679-689.
- Burden, S. and Yarden, Y. (1997). Neuregulins and their receptors: a versatile signaling module in organogenesis and oncogenesis. *Neuron* **18**, 847-855.
- Carraway, K. L., III, Weber, J. L., Unger, M. J., Ledesma, J., Yu, N., Gassmann, M. and Lai, C. (1997). Neuregulin-2, a new ligand for ErbB3/ErbB4-receptor tyrosine kinases. *Nature* **387**, 512-516.
- Daly, J. M., Jannot, C. B., Beerli, R. R., Graus-Porta, D., Maurer, F. G. and Hynes, N. E. (1997). Neu differentiation factor induces ErbB2 down-regulation and apoptosis of ErbB2-overexpressing breast tumor cells. *Cancer Res.* **57**, 3804-3811.
- Daly, J. M., Olayioye, M. A., Wong, A. M., Neve, R., Lane, H. A., Maurer, F. G. and Hynes, N. E. (1999). NDF/hereregulin-induced cell cycle changes and apoptosis in breast tumor cells: role of PI3 kinase and p38 MAP kinase pathways. *Oncogene* **18**, 3440-3451.
- Demetri, G. D. (1999). Induction of solid tumor differentiation by the peroxisome proliferator-activated receptor-gamma ligand troglitazone in patients with liposarcoma. *Proc. Natl. Acad. Sci. USA* **96**, 3951-3956.
- Dhasekaran, N. and Reddy, E. P. (1998). Signaling by dual specificity kinases. *Oncogene* **17**, 1447-1455.
- Drebin, J. A., Link, V. C., Weinberg, R. A. and Greene, M. I. (1986). Inhibition of tumor growth by a monoclonal antibody reactive with an oncogen-encoded tumor antigen. *Proc. Natl. Acad. Sci. USA* **83**, 9129-9133.
- Dreyer, C., Krey, G., Keller, H., Givel, J., Helftenbein, G. and Wahli, W. (1992). Control of the peroxisomal beta-oxidation pathway by a novel family of nuclear receptors. *Cell* **68**, 879-887.
- Elstner, E., Muller, C., Koshizuka, K., Williamson, E. A., Park, D., Asou, H., Shintaku, P., Said, J. W., Heber, D. and Koeffler, H. P. (1998). Ligands for peroxisome proliferator-activated receptor and retinoic acid inhibit growth and induce apoptosis of human breast cancer cells in vitro and in BNX mice. *Proc. Natl. Acad. Sci. USA* **95**, 8806-8811.
- Flores, A. I., Mallon, B. S., Matsui, T., Agawa, W., Rosenzweig, A., Okamoto, T. and Macklin, W. B. (2000). Akt-mediated survival of oligodendrocytes induced by neuregulins. *J. Neurosci.* **20**, 7622-7630.
- Gimble, J. M. (1998). Expression of peroxisome proliferator activated receptor mRNA in normal and tumorigenic rodent mammary glands. *Biochem. Biophys. Res. Comm.* **253**, 813-817.
- Greenspan, P., Mayer, E. P. and Fowler, S. D. (1985). Nile red: a selective fluorescent stain for intracellular lipid droplets. *J. Cell. Biol.* **100**, 965-973.
- Harari, D., Tzahar, E., Romano, J., Shelly, M., Pierce, J. H., Andrews, G. C. and Yarden, Y. (1999). Neuregulin-4: a novel growth factor that acts through the ErbB-4 receptor tyrosine kinase. *Oncogene* **18**, 2681-2689.
- Johnson, M. D., Campbell, L. K. and Campbell, R. K. (1998). Troglitazone: review and assessment of its role in the treatment of patients with impaired glucose tolerance and diabetes mellitus. *Ann. Pharmacother.* **32**, 337-348.
- Kilgore, M. W., Tate, P. L., Rai, S., Sengoku, E. and Price, T. M. (1997). MCF-7 and T47D human breast cancer cells contain a functional peroxisomal response. *Mol. Cell. Endocrinol.* **129**, 229-235.
- Kirchhoff, S. and Hauser, H. (1999). Cooperative activity between HER oncogenes and the tumor suppressor IRF-1 results in apoptosis. *Oncogene* **18**, 3725-3736.
- Kliwer, S. A., Forman, B. M., Blumberg, B., Ong, E. S., Borgmeyer, U., Mangelsdorf, D. J., Umehono, K. and Evans, R. M. (1994). Differential expression and activation of a family of murine peroxisome-proliferator-activated receptors. *Proc. Natl. Acad. Sci.* **91**, 7355-7359.
- Kraus, M. H., Popescu, N. C., Amsbaugh, S. C. and King, C. R. (1987). Overexpression of the EGF receptor-related protooncogene erbB-2 in human mammary tumor cell lines by different molecular mechanisms. *EMBO J.* **6**, 605-610.
- Krisst, D. A. and Yarden, Y. (1996). Differences between phosphotyrosine accumulation and Neu/ErbB2 receptor expression in astrocytic proliferative processes. Implications for glial oncogenesis. *Cancer* **78**, 1272-1283.
- Lehmann, J. M., Moore, L. B., Smith-Oliver, T. A., Wilkison, W. O., Willson, T. M. and Kliwer, S. A. (1995). An antidiabetic thiazolidinedione is a high affinity ligand for peroxisome proliferator-activated receptor gamma (PPAR gamma). *J. Biol. Chem.* **270**, 12953-12956.
- Lemke, G. (1996). Neuregulins in development. *Mol. Cell. Neurosci.* **7**, 247-262.
- Mangelsdorf, D. and Evans, R. M. (1995). The RXR heterodimers and orphan receptors. *Cell* **83**, 841-850.
- Michalik, L. and Wahli, W. (1999). Peroxisome proliferator-activated receptors: three isotypes for a multitude of functions. *Curr. Opin. Biotechnol.* **10**, 564-570.
- Mueller, E., Sarraf, P., Tontonoz, P., Evans, R. M., Martin, K. J., Zhang, M., Fletcher, C., Singer, S. and Spiegelman, B. M. (1998). Terminal differentiation of human breast cancer through PPAR $\gamma$ . *Mol. Cell* **1**, 465-470.
- Nguyen, B., Keane, M. M. and Johnston, P. J. (1995). The biology of growth regulation in normal and malignant breast epithelium: from bench to clinic. *Crit. Rev. Oncol. Hematol.* **20**, 223-236.
- Olayioye, M. A., Neve, R. M., Lane, H. A. and Hynes, N. E. (2000). The

- ErbB signaling network: receptor heterodimerization in development and cancer. *EMBO J.* **19**, 3159-3167.
- Pages, G., Lenormand, P., L'Allemain, G., Chambard, J. C., Meloche, S. and Pouyssegur, J.** (1993). Mitogen-activated protein kinases p42<sup>mapk</sup> and p44<sup>mapk</sup> are required for fibroblast proliferation. *Proc. Natl. Acad. Sci. USA* **90**, 8319-8323.
- Paterson, M. C.** (1991). Correlation between c-erbB2 amplification and risk of recurrent disease in node-negative breast cancer. *Cancer Res.* **51**, 556-567.
- Riese, D. J., II and Stern, D. F.** (1998). Specificity within the EGF family/ErbB receptor family signaling network. *BioEssays* **20**, 41-48.
- Sarraf, P., Mueller, E., Jones, D., King, F. J., DeAngelo, D. J., Partridge, J. B., Holden, S. A., Chen, L. B., Singer, S., Fletcher, C. and Spiegelman, B. M.** (1998). Differentiation and reversal of malignant changes in colon cancer through PPAR $\gamma$ . *Nat. Med.* **4**, 1046-1052.
- Schoonjans, K., Martin, G., Staels, B. and Auwerx, J.** (1997). Peroxisome proliferator-activated receptors, orphans with ligands and junctions. *Curr. Opin. Lipidol.* **8**, 159-166.
- Siegel, P. M., Ryan, E. D., Cardiff, R. D. and Muller, W. J.** (1999). Elevated expression of activated forms of Neu/erbB2 and erbB3 are involved in the induction of mammary tumors in transgenic mice: implications for human breast cancer. *EMBO J.* **18**, 2149-2164.
- Slamon, D. J., Godolphin, W., Jones, L. A., Holt, J. A., Wong, S. G., Keith, D. E., Levin, W. J., Stuart, S. G., Udove, J., Ullrich, A. and Press, M. F.** (1989). Studies of the Her2/neu proto-oncogene in human breast and ovarian cancer. *Science* **244**, 707-712.
- Spiegelman, B. M.** (1998). PPAR $\gamma$  in monocytes: less pain, any gain? *Cell* **93**, 153-155.
- Tontonoz, P., Hu, E., Graves, R. A., Budavari, A. and Spiegelman, B. M.** (1994a). mPPAR $\gamma$ : tissue-specific regulator of an adipocyte enhancer. *Genes. Dev.* **8**, 1224-1234.
- Tontonoz, P., Hu, E. and Spiegelman, B. M.** (1994b). Stimulation of adipogenesis in fibroblasts by PPAR gamma 2, a lipid-activated transcription factor. *Cell* **79**, 1147-1156.
- Walker, R. A.** (1998). The ErbB/HER type 1 tyrosine kinase receptor family. *J. Pathol.* **185**, 234-235.
- Zhang, D., Sliwkowski, M. X., Mark, M., Frantz, G., Akita, R., Sun, Y., Hillan, K., Crowley, C., Brush, J. and Godowski, P. J.** (1997). Neuregulin-3 (NRG3): a novel neural tissue-enriched protein that binds and activates ErbB4. *Proc. Natl. Acad. Sci. USA* **94**, 9562-9567.
- Zhao, Y. Y., Sawyer, D. R., Baliga, D. R., Opel, D. J., Han, X., Marchionni, M. and Kelly, R. A.** (1998). Neuregulins promote survival and growth of cardiac myocytes. Persistence of ErbB2 and ErbB4 expression in neonatal and adult ventricular myocytes. *J. Biol. Chem.* **273**, 10261-10269.
